# Supplementary material for: Pathways from marine protected area design and management to ecological success
Source: PeerJ. 2015 Nov 26;3:e1424. doi: 10.7717/peerj.1424 (PMC4671168; doi:10.7717/peerj.1424)
Supplement: Data S1 — Raw data. [file peerj-03-1424-s001.xlsx]

## Sheet: Data for QCA
		MPA			MPA	Ecoregion	State	Regulations	Enforcement	Age	Area	Isolation	Species richness	lnSppRich	SetSppRich_Hi	Species richness (large fishes)	lnSppRichLarge	SetSppRichLarge_Hi	Biomass (g)	lnBiomass	SetBio_Hi	Biomass large fishes (g)	lnBiomassLarge	SetBioLarge_Hi	Shark (g)	lnShark	SetShark_Hi	Grouper (g)	lnGrouper	SetGrouper_Hi	Jacks (g)	lnJacks	SetJack_Hi	Damselfishes (g)	LnDamsel	SetDamsel_Hi
1	001	Aldinga Reef		001. Aldinga Reef	001. Aldinga Reef	South Australian Gulfs	South Australia	1	1	1	0	0	11.2625	2.50655	0.437629	2.15	1.1474	0.557296	9900.94	9.20049	0.404878	6340.01	8.75479	0.625922	0	0	0	0	0	0	0	0	0	121.843	4.81091	0.226019
2	002	Baie Ternay		002. Baie Ternay	002. Baie Ternay	Seychelles	Seychelles	1	0	1	0	0	41.25	3.7436	0.97548	3.75	1.55814	0.798909	35025.9	10.4639	0.705684	7236.1	8.88698	0.651341	0	0	0	112.609	4.73277	0.533252	0	0	0	870.063	6.76971	0.563744
3	003	Batemans Marine Park	a	003. Batemans Marine Park a	003. Batemans Marine Park a	Cape Howe	New South Wales	1	1	0	0	0	12.889	2.6311	0.491781	4.28583	1.66503	0.861783	40739.7	10.615	0.741663	11040.4	9.30941	0.732579	1100.94	7.00483	0.716458	61.0535	4.128	0.446857	13466.4	9.50802	1	8739.53	9.07573	0.961332
4	004	Beware Reef Marine Sanctuary		004. Beware Reef Marine Sanctuary	004. Beware Reef Marine Sanctuary	Cape Howe	Victoria	1	1	0	0	1	12.2823	2.58643	0.472362	4.7875	1.7557	0.915118	47743.3	10.7736	0.779432	11568.3	9.35611	0.74156	1071.15	6.97743	0.713344	0	0	0	235.122	5.46435	0.379131	1816.44	7.50519	0.690549
5	005	Bushrangers Bay Aquatic Reserve		005. Bushrangers Bay Aquatic Reserve	005. Bushrangers Bay Aquatic Reserve	Cape Howe	New South Wales	1	1	0	0	0	16.5	2.8622	0.592261	2.5	1.25276	0.619272	11576.2	9.35679	0.442093	4163.08	8.33425	0.545048	0	0	0	0	0	0	0	0	0	4335.94	8.37492	0.840504
6	006	Cabbage Tree Bay Aquatic Reserve		006. Cabbage Tree Bay Aquatic Reserve	006. Cabbage Tree Bay Aquatic Reserve	Manning-Hawkesbury	New South Wales	1	1	0	0	0	23.5565	3.20098	0.739556	3.52083	1.5087	0.769821	38447.4	10.5571	0.727874	10817.4	9.289	0.728654	1232.8	7.11786	0.729302	9.38412	2.34028	0.191468	7183.5	8.87968	0.904566	1091.93	6.99662	0.602866
7	007	Caletas		007. Caletas	007. Caletas	Nicoya	Costa Rica	1	0	0	1	0	10.7917	2.46739	0.420606	0.125	0.117783	0	3138.84	8.05193	0.131411	190.365	5.25418	0	0	0	0	273.17	5.61375	0.659107	0	0	0	441.33	6.09206	0.446906
8	008	Camaronal		008. Camaronal	008. Camaronal	Nicoya	Costa Rica	1	0	0	1	0	10.0833	2.40544	0.393671	0.208333	0.189242	0	2362.63	7.76795	0.0637985	462.276	6.13832	0.122754	0	0	0	200.884	5.30769	0.615385	0	0	0	833.909	6.72732	0.556435
9	009	Cape Byron Marine Park		009. Cape Byron Marine Park	009. Cape Byron Marine Park	Tweed-Moreton	New South Wales	1	1	0	0	0	31.1667	3.47093	0.856926	7.75	2.16905	1	71649.3	11.1796	0.876084	39356	10.5804	0.977005	3834.62	8.25209	0.858192	177.553	5.18488	0.597841	1258.84	7.13874	0.636729	4283.48	8.36275	0.838406
10	010	Cape Howe Marine National Park		010. Cape Howe Marine National Park	010. Cape Howe Marine National Park	Cape Howe	Victoria	1	1	0	0	0	13.2438	2.65632	0.502747	4.8875	1.77283	0.925195	47033.1	10.7586	0.775864	8292.38	9.02321	0.677541	1847.03	7.52188	0.775213	0	0	0	31850.1	10.3688	1	947.881	6.85528	0.578497
11	011	Cape Rodney to Okakari Point Marine Reserve		011. Cape Rodney to Okakari Point Marine Reserve	011. Cape Rodney to Okakari Point Marine Reserve	Northeastern New Zealand	New Zealand	1	1	1	0	0	5.94048	1.93737	0.190161	2.0119	1.10257	0.530925	12836.2	9.4601	0.466692	7683.45	8.94695	0.662876	0	0	0	0	0	0	4128.01	8.32579	0.819353	88.2246	4.49116	0.170889
12	012	Cathedral Cove Marine Reserve		012. Cathedral Cove Marine Reserve	012. Cathedral Cove Marine Reserve	Northeastern New Zealand	New Zealand	1	1	1	0	0	7.22083	2.10667	0.26377	2.39583	1.22255	0.6015	26253.3	10.1756	0.637044	18638.8	9.83305	0.83328	0	0	0	0	0	0	7618.48	8.93846	0.91361	198.91	5.29787	0.309977
13	013	Channel Islands National Marine Sanctuary	a	013. Channel Islands National Marine Sanctuary a	013. Channel Islands National Marine Sanctuary a	Northern California	California	1	1	0	0	0	7.91667	2.18792	0.299097	2.66667	1.29928	0.646637	7196.88	8.88154	0.328939	5089.54	8.53514	0.583681	0	0	0	0	0	0	0	0	0	8.82607	2.28504	0
14	014	Channel Islands National Marine Sanctuary	b	014. Channel Islands National Marine Sanctuary b	014. Channel Islands National Marine Sanctuary b	Southern California Bight	California	1	1	0	0	0	11.0889	2.49229	0.431429	3.85556	1.58012	0.811837	20734.6	9.93961	0.580858	8126.6	9.00302	0.673658	4.39845	1.68611	0.112058	0	0	0	0	0	0	9758.95	9.18604	0.980352
15	015	Cocos National Park		015. Cocos National Park	015. Cocos National Park	Cocos Islands	Costa Rica	1	1	1	1	1	23.7483	3.20876	0.742938	5.77065	1.9126	1	110809	11.6156	0.979898	64481.3	11.0741	1	26513.2	10.1854	1	718.689	6.57882	0.796974	7484.31	8.9207	0.910877	3099.18	8.03922	0.782623
16	016	Coiba National Park	a	016. Coiba National Park a	016. Coiba National Park a	Nicoya	Panama	1	0	0	1	1	20.9773	3.09001	0.691309	3.06534	1.4025	0.707352	43838.4	10.6883	0.759116	20138.1	9.91042	0.848157	305.65	5.72571	0.571103	1603.58	7.38062	0.911517	5037.39	8.52484	0.849976	3425.51	8.1393	0.799879
17	017	Ponta da Baleia-Abrolhos	a	017. Ponta da Baleia-Abrolhos a	017. Ponta da Baleia-Abrolhos a	Eastern Brazil	Brazil	1	0	1	1	0	17.2679	2.90514	0.610932	2.78571	1.33123	0.665432	24146.4	10.0919	0.617126	5810.53	8.6676	0.609154	0	0	0	217.185	5.38534	0.626477	18.0092	2.94492	0	3554.32	8.1762	0.806241
18	018	Fiordo Comau Protected Area		018. Fiordo Comau Protected Area	018. Fiordo Comau Protected Area	Chiloense	Chile	1	0	0	0	0	2.55	1.26695	0	1.1	0.741937	0.318787	7101.64	8.86822	0.325767	3584.86	8.18475	0.516299	0	0	0	0	0	0	0	0	0	0	0	0
19	019	Florida Keys National Marine Sanctuary	a	019. Florida Keys National Marine Sanctuary a	019. Florida Keys National Marine Sanctuary a	Floridian	Florida	1	1	1	0	0	30.9167	3.46313	0.853534	7.16667	2.10006	1	81425.6	11.3075	0.906537	24570.8	10.1094	0.886414	0	0	0	6255.78	8.74142	1	310.071	5.74002	0.421542	3816.44	8.24734	0.818506
20	020	Florida Keys National Marine Sanctuary	b	020. Florida Keys National Marine Sanctuary b	020. Florida Keys National Marine Sanctuary b	Floridian	United States	1	1	1	1	0	22.125	3.14091	0.713441	4.16667	1.64223	0.848369	39137	10.5749	0.732107	8308.39	9.02514	0.677912	0	0	0	344.93	5.84624	0.692319	6507.09	8.7808	0.889354	2649.44	7.88248	0.7556
21	021	Fly Point-Halifax Park		021. Fly Point-Halifax Park	021. Fly Point-Halifax Park	Manning-Hawkesbury	New South Wales	1	1	1	0	0	22.5481	3.15904	0.721323	3.73864	1.55575	0.7975	25650.2	10.1523	0.631511	13681.8	9.52389	0.773825	772.775	6.65128	0.676282	236.155	5.46871	0.638388	499.769	6.21614	0.494791	361.705	5.89359	0.412688
22	022	Galapagos Marine Reserve	a	022. Galapagos Marine Reserve a	022. Galapagos Marine Reserve a	Eastern Galapagos Islands	Ecuador	1	0	0	0	0	23.4722	3.19754	0.73806	9.93056	2.39156	1	189525	12.1523	1	108527	11.5948	1	21312.8	9.96711	1	4939.67	8.50526	1	2980.49	8.00018	0.769258	9502.49	9.15941	0.975761
23	023	Galapagos Marine Reserve	b	023. Galapagos Marine Reserve b	023. Galapagos Marine Reserve b	Northern Galapagos Islands	Ecuador	1	1	0	0	0	23.8	3.21084	0.743845	9.95	2.39334	1	136053	11.8208	1	100756	11.5205	1	63531.7	11.0593	1	597.236	6.39398	0.770569	1646.41	7.40696	0.677994	1356.97	7.21374	0.6403
24	024	Galapagos Marine Reserve	c	024. Galapagos Marine Reserve c	024. Galapagos Marine Reserve c	Western Galapagos Islands	Ecuador	1	0	0	0	0	14.7375	2.75605	0.546107	5.675	1.89837	0.999041	128120	11.7607	1	39149.3	10.5752	0.975993	136.649	4.92471	0.48008	3644.99	8.20138	1	0	0	0	5811.54	8.66777	0.890995
25	025	Golfo de Chiriqui Marine National Park		025. Golfo de Chiriqui Marine National Park	025. Golfo de Chiriqui Marine National Park	Nicoya	Panama	1	0	1	1	0	15.5625	2.80714	0.568322	0.625	0.485508	0.167946	7318.63	8.89832	0.332932	470.797	6.15655	0.126259	0	0	0	1025.57	6.93398	0.847712	354.432	5.87333	0.442051	2102.16	7.6512	0.715724
26	026	Governor Island Marine Nature Reserve		026. Governor Island Marine Nature Reserve	026. Governor Island Marine Nature Reserve	Bassian	Tasmania	1	1	1	0	0	2.83333	1.34373	0	1.5	0.916291	0.421347	1189.13	7.08182	0	916.98	6.82218	0.254265	0	0	0	0	0	0	0	0	0	0	0	0
27	027	Great Barrier Reef MP	a	027. Great Barrier Reef MP a	027. Great Barrier Reef MP a	Southern Great Barrier Reef	Queensland	1	1	0	1	0	37.0393	3.63862	0.929835	2.54345	1.2651	0.62653	30318.8	10.3196	0.671323	8106.25	9.00051	0.673176	607.575	6.41112	0.648991	636.749	6.45794	0.779706	1068.59	6.97503	0.611543	10303.6	9.24035	0.989715
28	028	Great Barrier Reef MP	b	028. Great Barrier Reef MP b	028. Great Barrier Reef MP b	Northern Great Barrier Reef	Queensland	1	1	0	0	0	50.6	3.94352	1	4.475	1.70019	0.882466	25735.4	10.1557	0.6323	9232.09	9.13055	0.698183	0	0	0	826.916	6.71891	0.816987	2842.58	7.95282	0.761972	5003.15	8.51802	0.865176
29	029	Hanauma Bay Marine Life Conservation District		029. Hanauma Bay Marine Life Conservation District	029. Hanauma Bay Marine Life Conservation District	Hawaii	Hawaii	1	1	1	0	0	25	3.2581	0.76439	3.5	1.50408	0.767104	16315.9	9.69996	0.523799	2653.51	7.88402	0.458464	0	0	0	0	0	0	200.856	5.30756	0.355009	407.677	6.01292	0.433263
30	030	Isla de Taboga e Isla de Uraba Wildlife Refuge		030. Isla de Taboga e Isla de Uraba Wildlife Refuge	030. Isla de Taboga e Isla de Uraba Wildlife Refuge	Panama Bight	Panama	1	0	1	0	0	16.25	2.84781	0.586005	3.25	1.44692	0.733482	13947	9.54309	0.48645	6321.49	8.75187	0.625359	0	0	0	1119.35	7.0214	0.8602	0	0	0	1718.36	7.44971	0.680984
31	031	Jervis Bay	a	031. Jervis Bay a	031. Jervis Bay a	Cape Howe	New South Wales	1	1	0	0	0	19.5071	3.02077	0.661206	3.68509	1.54439	0.790815	53329	10.8843	0.805775	10031.6	9.21359	0.714152	2498.14	7.8237	0.809511	4.02445	1.61432	0.0877594	25688.2	10.1538	1	2185.94	7.69026	0.722458
32	032	Jurien Bay	a	032. Jurien Bay a	032. Jurien Bay a	Houtman	Western Australia	1	1	0	0	0	12.1667	2.57769	0.46856	2.39583	1.22255	0.6015	9277.75	9.13548	0.389401	4036.61	8.30341	0.539117	0	0	0	94.694	4.56116	0.508737	0	0	0	3202.56	8.07202	0.788279
33	033	Kent Group Marine Park	a	033. Kent Group Marine Park a	033. Kent Group Marine Park a	Cape Howe	Tasmania	1	1	0	1	0	9.3875	2.3406	0.36548	2.7375	1.31842	0.657892	21247.3	9.96403	0.586675	3522.56	8.16723	0.512928	159.383	5.07756	0.49745	0	0	0	0	0	0	716.205	6.57536	0.530235
34	034	Kermadec Marine Reserve		034. Kermadec Marine Reserve	034. Kermadec Marine Reserve	Kermadec Island	New Zealand	1	1	1	1	1	16.9107	2.8854	0.602347	5.16667	1.81916	0.952446	116961	11.6696	0.992764	77886.6	11.263	1	30772.2	10.3344	1	1791.42	7.49132	0.927332	3043.4	8.02106	0.772471	9730.21	9.18309	0.979844
35	035	La Restinga-Mar de las Calmas MPA		035. La Restinga-Mar de las Calmas MPA	035. La Restinga-Mar de las Calmas MPA	Azores Canaries Madeira	Spain	1	1	1	0	0	10.7778	2.46621	0.420093	5.61111	1.88875	0.993383	19514.7	9.87897	0.566422	9606.68	9.17032	0.70583	0	0	0	1190.28	7.08278	0.868969	429.69	6.06539	0.471598	1037.42	6.94546	0.594045
36	036	La RŽserve Naturelle Marine de Cerbre Banyuls		036. La RŽserve Naturelle Marine de Cerbre Banyuls	036. La RŽserve Naturelle Marine de Cerbre Banyuls	Western Mediterranean	France	1	1	1	0	0	9.9375	2.3922	0.387912	1.5625	0.940983	0.435873	9016.39	9.10691	0.382598	3052.83	8.02415	0.485414	0	0	0	85.9829	4.46571	0.495102	0	0	0	967.369	6.87561	0.582002
37	037	Lord Howe Commonwealth MPA	a	037. Lord Howe Commonwealth MPA a	037. Lord Howe Commonwealth MPA a	Lord Howe and Norfolk Islands	Australia	1	1	1	1	1	23.9706	3.2177	0.746826	4.75	1.7492	0.911294	47704.6	10.7728	0.779239	36704.7	10.5107	0.963594	19849.6	9.89599	1	2164.44	7.68038	0.95434	1918.95	7.56006	0.701547	3134.94	8.05068	0.784601
38	038	Lord Howe Island Marine Park	a	038. Lord Howe Island Marine Park a	038. Lord Howe Island Marine Park a	Lord Howe and Norfolk Islands	New South Wales	1	1	1	0	0	20.7642	3.08027	0.687072	2.69231	1.30625	0.650736	52106.7	10.8611	0.800254	35908.6	10.4888	0.959377	4294.62	8.36535	0.871063	128.478	4.86351	0.55193	1730.68	7.45684	0.685668	7089.38	8.86649	0.925258
39	039	Machalilla		039. Machalilla	039. Machalilla	Guayaquil	Ecuador	1	0	1	0	0	18.6667	2.97893	0.643011	2.81667	1.33938	0.670222	11883.3	9.38298	0.448328	3711.59	8.21948	0.522978	0	0	0	940.866	6.84786	0.835409	0	0	0	3270.46	8.09299	0.791895
40	040	Malpelo Flora and Fauna Sanctuary		040. Malpelo Flora and Fauna Sanctuary	040. Malpelo Flora and Fauna Sanctuary	Panama Bight	Colombia	1	1	1	1	1	18.5953	2.97529	0.641431	4.90909	1.77649	0.927348	115217	11.6546	0.989186	59052.7	10.9862	1	35804.6	10.4859	1	4741.19	8.46425	1	2731.03	7.9128	0.755816	5624.86	8.63513	0.885367
41	041	Maria Island Marine Reserve		041. Maria Island Marine Reserve	041. Maria Island Marine Reserve	Bassian	Tasmania	1	1	1	0	0	6.9375	2.0716	0.248521	2.25	1.17865	0.575679	6119.06	8.71933	0.290316	3494.55	8.15924	0.511393	68.5946	4.24269	0.402578	0	0	0	131.955	4.89001	0.290771	0	0	0
42	042	Marmion Marine Park	a	042. Marmion Marine Park a	042. Marmion Marine Park a	Houtman	Western Australia	1	1	1	0	0	14.25	2.72458	0.532426	3	1.38629	0.69782	6913.94	8.84144	0.31939	1745.97	7.46564	0.378007	0	0	0	0	0	0	0	0	0	1270.97	7.14833	0.629022
43	043	Mnazi Bay-Ruvuma Estuary Marine Park		043. Mnazi Bay-Ruvuma Estuary Marine Park	043. Mnazi Bay-Ruvuma Estuary Marine Park	East African Coral Coast	Tanzania	1	0	1	1	0	60.5	4.11904	1	3	1.38629	0.69782	21495.2	9.97563	0.589436	1469.27	7.2932	0.344847	0	0	0	301.888	5.71336	0.673338	0	0	0	3007.21	8.0091	0.777431
44	044	Motu Motiro Hiva		044. Motu Motiro Hiva	044. Motu Motiro Hiva	Easter Island	Chile	1	0	0	1	1	13.2812	2.65895	0.50389	2.03125	1.10898	0.534691	27284.5	10.2141	0.646216	6289.05	8.74672	0.62437	3722.42	8.2224	0.854818	0	0	0	204.53	5.32559	0.357783	1031.81	6.94004	0.59311
45	045	Mushi Mas Mingili Thila		045. Mushi Mas Mingili Thila	045. Mushi Mas Mingili Thila	Maldives	Maldives	1	1	1	0	0	52	3.97029	1	5.5	1.8718	0.983413	62126.6	11.0369	0.84213	24057	10.0882	0.88235	0	0	0	0	0	0	8716.73	9.07311	0.934325	365.444	5.90384	0.414456
46	046	Ninepin Point Marine Reserve		046. Ninepin Point Marine Reserve	046. Ninepin Point Marine Reserve	Bassian	Tasmania	1	0	0	0	0	5.33333	1.84583	0.150359	0.958333	0.672094	0.277702	8160.34	9.00716	0.358849	1715.31	7.44793	0.374603	0	0	0	0	0	0	0	0	0	0	0	0
47	047	Ningaloo Marine Park	a	047. Ningaloo Marine Park a	047. Ningaloo Marine Park a	Exmouth to Broome	Western Australia	1	1	1	0	0	31	3.46574	0.854668	1.33333	0.847298	0.380763	22739.3	10.0319	0.602832	3652.87	8.20354	0.519912	0	0	0	256.337	5.55039	0.650055	0	0	0	4372.36	8.38329	0.841946
48	048	Ningaloo Marine Park	b	048. Ningaloo Marine Park b	048. Ningaloo Marine Park b	Ningaloo	Western Australia	1	1	1	0	0	35.3655	3.59362	0.91027	3.90298	1.58984	0.817554	26817.6	10.1968	0.642107	8466.08	9.04394	0.681527	0	0	0	841.972	6.73693	0.819562	2330.7	7.75435	0.731439	3074.51	8.03123	0.781246
49	049	Pangaimotu Reef MPA		049. Pangaimotu Reef MPA	049. Pangaimotu Reef MPA	Tonga Islands	Tonga	1	0	1	0	0	34.5	3.56953	0.899797	0.5	0.405465	0.120862	8840.45	9.08721	0.377906	1998.4	7.6006	0.403962	0	0	0	1982.51	7.59262	0.941803	0	0	0	2858.91	7.95855	0.768715
50	050	Point Cooke Marine Sanctuary		050. Point Cooke Marine Sanctuary	050. Point Cooke Marine Sanctuary	Bassian	Victoria	1	1	0	0	0	1.16667	0.77319	0	0.166667	0.154151	0	292.071	5.68042	0	103.56	4.64976	0	0	0	0	0	0	0	0	0	0	0	0	0
51	051	Point Lobos State Marine Reserve		051. Point Lobos State Marine Reserve	051. Point Lobos State Marine Reserve	Northern California	California	1	1	0	0	0	7	2.07944	0.251931	3	1.38629	0.69782	3520.41	8.16662	0.158718	2865.31	7.96078	0.473227	0	0	0	0	0	0	0	0	0	0	0	0
52	052	Poor Knights Island Marine Reserve		052. Poor Knights Island Marine Reserve	052. Poor Knights Island Marine Reserve	Northeastern New Zealand	New Zealand	1	1	1	0	1	10.0909	2.40613	0.393968	3.21023	1.43752	0.727951	28003.8	10.2401	0.652412	9731.08	9.18318	0.708304	0	0	0	0	0	0	3304.88	8.10346	0.785147	10895.4	9.29618	0.999342
53	053	Port Davey National Park	a	053. Port Davey National Park a	053. Port Davey National Park a	Bassian	Tasmania	1	1	0	0	0	2.27344	1.18584	0	0.617188	0.480689	0.165111	783.236	6.66471	0	345.151	5.84687	0.0667067	79.6914	4.39063	0.41939	0	0	0	0	0	0	0	0	0
54	054	Port Noarlunga Reef		054. Port Noarlunga Reef	054. Port Noarlunga Reef	South Australian Gulfs	South Australia	1	1	1	0	0	15.75	2.8184	0.573217	5.75	1.90954	1	13210.9	9.48888	0.473542	8895.66	9.09343	0.691044	0	0	0	0	0	0	0	0	0	673.336	6.51373	0.519608
55	055	Port Phillip Heads Marine National Park		055. Port Phillip Heads Marine National Park	055. Port Phillip Heads Marine National Park	Bassian	Victoria	1	1	0	0	0	7.96386	2.1932	0.301392	2.87633	1.35489	0.679346	11706.7	9.368	0.444762	7433.39	8.91387	0.656514	1166.31	7.06246	0.723007	0	0	0	0	0	0	1092.69	6.99732	0.602985
56	056	Port Stephens Great Lake Marine Park	a	056. Port Stephens Great Lake Marine Park a	056. Port Stephens Great Lake Marine Park a	Manning-Hawkesbury	New South Wales	1	1	0	0	0	20.0005	3.04455	0.671543	3.01175	1.38923	0.699546	35152	10.4675	0.706539	4747.17	8.46551	0.570291	817.696	6.70771	0.682695	14.7793	2.7587	0.251243	22396.3	10.0167	1	1851.18	7.52412	0.693813
57	057	Regno di Nettuno	a	057. Regno di Nettuno a	057. Regno di Nettuno a	Western Mediterranean	Italy	1	0	0	0	0	9.75	2.37491	0.380394	0.25	0.223144	0.0136139	4885.1	8.49415	0.236702	126.065	4.8447	0	0	0	0	0	0	0	0	0	0	1971.32	7.58697	0.704649
58	058	Rickett's Point Marine Sanctuary		058. Rickett's Point Marine Sanctuary	058. Rickett's Point Marine Sanctuary	Bassian	Victoria	1	1	0	0	0	3.33333	1.46634	0	0.5	0.405465	0.120862	887.257	6.78926	0	456.022	6.12473	0.120141	0	0	0	0	0	0	0	0	0	27.8471	3.36201	0
59	059	Rose Atoll National Wildlife Refuge		059. Rose Atoll National Wildlife Refuge	059. Rose Atoll National Wildlife Refuge	Samoa Islands	American Samoa	1	1	1	0	0	29.15	3.40618	0.828776	1.9	1.06471	0.508653	24841.2	10.1203	0.623881	2655.27	7.88468	0.458592	0	0	0	137.135	4.92823	0.561176	106.055	4.67335	0.257438	314.025	5.75265	0.388388
60	060	Rottnest Island	a	060. Rottnest Island a	060. Rottnest Island a	Leeuwin	Western Australia	1	1	0	0	0	15.2028	2.78518	0.558775	2.82619	1.34187	0.671688	27336.4	10.216	0.646669	15899.6	9.67411	0.802714	83.6821	4.4389	0.424875	41.0961	3.73995	0.391422	129.923	4.87461	0.288402	1471.59	7.29478	0.654273
61	061	Seaflower Area Marina Protegida	a	061. Seaflower Area Marina Protegida a	061. Seaflower Area Marina Protegida a	Southwestern Caribbean	Colombia	1	0	0	0	0	25.605	3.2811	0.774391	2.54048	1.26426	0.626036	21208.9	9.96222	0.586244	4699.74	8.45547	0.56836	0	0	0	363.381	5.8982	0.699743	339.121	5.8293	0.435277	1037.38	6.94542	0.594038
62	062	Sesoko Scientific Research Area		062. Sesoko Scientific Research Area	062. Sesoko Scientific Research Area	South Kuroshio	Japan	1	0	1	0	0	41	3.73767	0.9729	0.5	0.405465	0.120862	19766.8	9.89181	0.569479	244.295	5.50246	0.000473345	0	0	0	24.3172	3.23148	0.318783	0	0	0	3283.53	8.09698	0.792583
63	063	Shiprock Aquatic Reserve		063. Shiprock Aquatic Reserve	063. Shiprock Aquatic Reserve	Manning-Hawkesbury	New South Wales	1	1	1	0	1	34.5	3.56953	0.899797	9	2.30259	1	71590.6	11.1787	0.875889	23222.4	10.0529	0.875561	0	0	0	463.997	6.14203	0.734576	5368.47	8.58848	0.859767	689.557	6.5375	0.523707
64	064	Shiraiwazaki Marine Park		064. Shiraiwazaki Marine Park	064. Shiraiwazaki Marine Park	Central Kuroshio Current	Japan	1	0	1	0	0	17.5	2.91777	0.616422	0.5	0.405465	0.120862	2960.4	7.99342	0.117481	307.883	5.73296	0.0448004	0	0	0	193.474	5.2703	0.610043	0	0	0	33.0776	3.52864	0.00493781
65	065	Solitary Islands Marine Park	a	065. Solitary Islands Marine Park a	065. Solitary Islands Marine Park a	Tweed-Moreton	New South Wales	1	1	0	0	0	21.0176	3.09184	0.692106	3.03519	1.39505	0.702973	73401.6	11.2037	0.881837	46802.7	10.7537	1	18366.3	9.81833	1	480.723	6.17737	0.739624	5979.12	8.6962	0.876338	7688.75	8.94764	0.939249
66	066	Sund Rock Marine Preserve		066. Sund Rock Marine Preserve	066. Sund Rock Marine Preserve	Puget Trough/Georgia Basin	Washington	1	1	1	0	0	6.75	2.04769	0.238127	1.25	0.81093	0.359371	3770.1	8.23512	0.175029	1093.71	6.99824	0.288123	0	0	0	0	0	0	0	0	0	0	0	0
67	067	Table Mountain National Park	a	067. Table Mountain National Park a	067. Table Mountain National Park a	Agulhas Bank	South Africa	1	0	1	0	0	6.52083	2.01768	0.225077	1.95833	1.08463	0.520368	21673.1	9.98387	0.591399	3904.29	8.27009	0.532709	106.255	4.67521	0.451729	0	0	0	23.0964	3.18206	0.0280095	0	0	0
68	068	Tawharanui Marine Reserve		068. Tawharanui Marine Reserve	068. Tawharanui Marine Reserve	Northeastern New Zealand	New Zealand	1	0	1	0	0	4.125	1.63413	0.0583176	1.25	0.81093	0.359371	3741.94	8.22763	0.173245	2644.19	7.8805	0.457788	0	0	0	0	0	0	334.699	5.81622	0.433264	0	0	0
69	069	Te Matuku Marine Reserve		069. Te Matuku Marine Reserve	069. Te Matuku Marine Reserve	Northeastern New Zealand	New Zealand	1	0	0	0	0	1.625	0.965081	0	0.0416667	0.040822	0	57.834	4.07472	0	21.3444	3.10657	0	0	0	0	0	0	0	0	0	0	0	0	0
70	070	Te Paepae o Aotea Marine Reserve		070. Te Paepae o Aotea Marine Reserve	070. Te Paepae o Aotea Marine Reserve	Northeastern New Zealand	New Zealand	1	1	0	0	1	8.5	2.25129	0.326649	3.80556	1.56977	0.805749	239052	12.3844	1	132568	11.7949	1	0	0	0	0	0	0	144.694	4.98151	0.304848	62889.7	11.0492	1
71	071	Tinderbox Marine Reserve		071. Tinderbox Marine Reserve	071. Tinderbox Marine Reserve	Bassian	Tasmania	1	1	0	0	0	6.56944	2.02412	0.227878	1.72222	1.00145	0.47144	4394.96	8.38844	0.211534	1858.14	7.52787	0.389975	0	0	0	0	0	0	0	0	0	0	0	0
72	072	Tsitsikamma National Park		072. Tsitsikamma National Park	072. Tsitsikamma National Park	Agulhas Bank	South Africa	1	1	1	1	0	8.63889	2.26581	0.332959	2.91667	1.36524	0.685436	27884.8	10.2359	0.651398	6293.68	8.74746	0.624511	0	0	0	158.318	5.0709	0.581558	0	0	0	0	0	0
73	073	Tuhua/Mayor Island marine reserve		073. Tuhua/Mayor Island marine reserve	073. Tuhua/Mayor Island marine reserve	Northeastern New Zealand	New Zealand	1	1	1	0	0	9.88333	2.38723	0.385753	4.46667	1.69867	0.88157	28336.2	10.2519	0.655222	14786.1	9.60151	0.788752	1034.19	6.94235	0.709357	0	0	0	4914.89	8.50023	0.846189	5737.71	8.65499	0.888791
74	074	Tulamben		074. Tulamben	074. Tulamben	Lesser Sunda	Indonesia	1	1	1	0	0	58.1111	4.07942	1	4.55556	1.7148	0.891058	27734.2	10.2305	0.650109	9273.96	9.13507	0.699053	0	0	0	90.0363	4.51126	0.501608	491.522	6.19954	0.492237	9189.53	9.12593	0.969988
75	075	Ushibuka Marine Park		075. Ushibuka Marine Park	075. Ushibuka Marine Park	Central Kuroshio Current	Japan	1	0	1	0	0	19.5	3.02042	0.661054	1	0.693147	0.290087	9623.09	9.17202	0.398101	866.45	6.76556	0.243376	0	0	0	528.533	6.272	0.753142	0	0	0	916.544	6.8217	0.572707
76	076	Batemans Marine Park	b	076. Batemans Marine Park b	076. Batemans Marine Park b	Cape Howe	New South Wales	0	1	0	1	0	12.8134	2.62564	0.48941	4.20887	1.65036	0.853155	41101.9	10.6238	0.74377	13429.6	9.50529	0.770248	1969.85	7.58622	0.782525	8.44914	2.24592	0.177989	12671	9.44715	0.99187	6105.36	8.71709	0.899498
77	077	Beacon Island Reef Observation Area		077. Beacon Island Reef Observation Area	077. Beacon Island Reef Observation Area	Houtman	Western Australia	0	0	1	0	1	19.8333	3.03655	0.668067	5	1.79176	0.936329	32474.1	10.3882	0.687674	24319.5	10.0991	0.884438	0	0	0	840.734	6.73546	0.819352	56.1401	4.04551	0.160847	1581.68	7.36687	0.666702
78	078	Bonaire		078. Bonaire	078. Bonaire	Southern Caribbean	Netherlands Antilles	0	1	1	0	1	29.8929	3.43052	0.839359	4.64286	1.73039	0.90023	19090.4	9.85699	0.561189	4526.5	8.41792	0.561139	0	0	0	76.8875	4.35527	0.479324	167.614	5.12761	0.327325	6447.04	8.77153	0.908885
79	079	Bronte-Coogee Aquatic Reserve		079. Bronte-Coogee Aquatic Reserve	079. Bronte-Coogee Aquatic Reserve	Manning-Hawkesbury	New South Wales	0	1	0	0	0	18.2222	2.95607	0.633073	2.63889	1.29168	0.642164	18163.5	9.80722	0.549339	4365.41	8.3817	0.554172	0	0	0	0	0	0	1099.15	7.0032	0.615877	1653.24	7.4111	0.674327
80	080	Channel Islands National Marine Sanctuary	c	080. Channel Islands National Marine Sanctuary c	080. Channel Islands National Marine Sanctuary c	Northern California	California	0	1	1	1	0	11.4167	2.51904	0.443061	2.91667	1.36524	0.685436	6050.32	8.70803	0.287626	2473.93	7.81397	0.444993	0	0	0	0	0	0	0	0	0	258.421	5.55845	0.354906
81	081	Channel Islands National Marine Sanctuary	d	081. Channel Islands National Marine Sanctuary d	081. Channel Islands National Marine Sanctuary d	Southern California Bight	California	0	1	1	1	0	10.5	2.44235	0.409716	2.21875	1.16899	0.569996	19123.8	9.85874	0.561605	2221.7	7.70648	0.424323	0	0	0	0	0	0	0	0	0	12793.3	9.45676	1
82	082	Coiba National Park	b	082. Coiba National Park b	082. Coiba National Park b	Nicoya	Panama	0	0	1	1	1	19.1905	3.00521	0.65444	3.22222	1.44036	0.729624	63765.8	11.063	0.84833	47314.1	10.7646	1	2393.29	7.78084	0.804641	1913.02	7.55696	0.936709	14594.1	9.58844	1	1999.39	7.6011	0.707086
83	083	Coral Patches Reef Observation Area		083. Coral Patches Reef Observation Area	083. Coral Patches Reef Observation Area	Houtman	Western Australia	0	0	1	0	1	12.3333	2.59027	0.474029	1.79167	1.02664	0.486258	11821.2	9.37773	0.44708	9277.35	9.13544	0.699123	0	0	0	136.092	4.92065	0.560093	0	0	0	1502.82	7.31576	0.65789
84	084	Coringa-Herald Nature Reserve		084. Coringa-Herald Nature Reserve	084. Coringa-Herald Nature Reserve	Coral Sea	Australia	0	0	1	1	1	41.9	3.75887	0.982118	2.75	1.32176	0.659856	23771.7	10.0763	0.613403	13572.5	9.51587	0.772284	5386.42	8.59182	0.896798	216.497	5.38218	0.626026	463.253	6.14043	0.483143	1516.11	7.32456	0.659408
85	085	Ponta da Baleia-Abrolhos	b	085. Ponta da Baleia-Abrolhos b	085. Ponta da Baleia-Abrolhos b	Eastern Brazil	Brazil	0	0	1	1	0	17.0833	2.89499	0.606518	2.58333	1.27629	0.633114	19239.8	9.86479	0.563045	5295.16	8.57474	0.591296	0	0	0	0	0	0	59.9001	4.10923	0.170651	1495.23	7.31071	0.657018
86	086	Florida Keys National Marine Sanctuary	c	086. Florida Keys National Marine Sanctuary c	086. Florida Keys National Marine Sanctuary c	Floridian	Florida	0	1	1	1	0	24.5	3.23868	0.755947	2.35	1.20896	0.593506	22993.6	10.043	0.605479	4354.93	8.37929	0.55371	0	0	0	206.19	5.33363	0.619091	265.005	5.58352	0.397464	2296.59	7.73962	0.730968
87	087	Fly Point-Halifax Park		087. Fly Point-Halifax Park	087. Fly Point-Halifax Park	Manning-Hawkesbury	New South Wales	0	1	1	0	0	22.4869	3.15644	0.720192	2.12727	1.14016	0.553036	9280.03	9.13573	0.389459	2725.6	7.91081	0.463617	236.823	5.47153	0.542219	26.7332	3.32263	0.331804	2.57501	1.27397	0	174.461	5.16742	0.287486
88	088	Galapagos Marine Reserve	d	088. Galapagos Marine Reserve d	088. Galapagos Marine Reserve d	Eastern Galapagos Islands	Ecuador	0	0	0	1	1	18.4615	2.96844	0.638452	6.57692	2.02511	1	156056	11.958	1	82508	11.3207	1	1036.22	6.9443	0.70958	2108.92	7.6544	0.950629	474.551	6.16447	0.486842	5941.15	8.68983	0.894798
89	089	Galapagos Marine Reserve	e	089. Galapagos Marine Reserve e	089. Galapagos Marine Reserve e	Northern Galapagos Islands	Ecuador	0	1	0	1	1	19.75	3.03255	0.666324	7.625	2.15466	1	72494.8	11.1913	0.878877	38424.5	10.5565	0.972399	6687.57	8.80816	0.921381	1332.24	7.19537	0.885052	376.814	5.9344	0.451447	3037.18	8.01901	0.77914
90	090	Galapagos Marine Reserve	f	090. Galapagos Marine Reserve f	090. Galapagos Marine Reserve f	Western Galapagos Islands	Ecuador	0	0	0	1	1	15.6136	2.81022	0.569663	6.75	2.04769	1	94860	11.4602	0.942897	48357.4	10.7864	1	89.8041	4.5087	0.432807	5895	8.68203	1	0	0	0	5575.63	8.62634	0.883852
91	091	Great Barrier Reef MP	c	091. Great Barrier Reef MP c	091. Great Barrier Reef MP c	Southern Great Barrier Reef	Queensland	0	1	0	1	0	35.0117	3.58384	0.906019	1.735	1.00613	0.474195	26942.3	10.2015	0.643212	6477.17	8.77619	0.630037	570.426	6.34814	0.641834	154.532	5.04685	0.578122	110.317	4.71238	0.263444	6760.95	8.81907	0.91708
92	092	Great Barrier Reef MP	d	092. Great Barrier Reef MP d	092. Great Barrier Reef MP d	Northern Great Barrier Reef	Queensland	0	1	0	0	0	59.8333	4.10814	1	3	1.38629	0.69782	20905.4	9.94781	0.582812	3268.97	8.09254	0.498565	0	0	0	382.857	5.95027	0.707181	0	0	0	3560.11	8.17783	0.806522
93	093	Illa del Toro		093. Illa del Toro	093. Illa del Toro	Western Mediterranean	Spain	0	1	0	0	1	12.5	2.60269	0.47943	3.25	1.44692	0.733482	17244	9.75528	0.53697	4140	8.32869	0.543979	0	0	0	490.037	6.19652	0.74236	0	0	0	8340.24	9.02897	0.95327
94	094	Jervis Bay	b	094. Jervis Bay b	094. Jervis Bay b	Cape Howe	New South Wales	0	1	0	1	0	16.9162	2.8857	0.60248	3.17883	1.43003	0.723547	47789.8	10.7746	0.779664	11002.7	9.30599	0.731921	4662.51	8.44752	0.8804	1.675	0.98395	0	18679.9	9.83525	1	7906.49	8.97557	0.944063
95	095	Jurien Bay	b	095. Jurien Bay b	095. Jurien Bay b	Houtman	Western Australia	0	1	0	1	0	10.9792	2.48317	0.427465	2.55833	1.26929	0.628995	11194.4	9.32326	0.434109	7196.13	8.88144	0.650276	0	0	0	44.6494	3.82099	0.402999	280.67	5.64074	0.406267	2086.15	7.64355	0.714406
96	096	Kawasan Wisata		096. Kawasan Wisata	096. Kawasan Wisata	Western Sumatra	Indonesia	0	0	1	0	0	50.4778	3.94115	1	1.81944	1.03654	0.492082	34686.8	10.4541	0.703367	2715.78	7.9072	0.462924	0	0	0	151.429	5.0267	0.575243	58.3593	4.08361	0.166709	3988.41	8.2914	0.826103
97	097	Kent Group Marine Park	b	097. Kent Group Marine Park b	097. Kent Group Marine Park b	Cape Howe	Tasmania	0	1	0	1	0	10.3125	2.42591	0.402569	2.83333	1.34373	0.672785	16794.9	9.72889	0.530688	3197.65	8.07048	0.494324	96.1226	4.57597	0.440452	0	0	0	0	0	0	970.07	6.8784	0.582483
98	098	Las Perlas Marine Special Management Zone		098. Las Perlas Marine Special Management Zone	098. Las Perlas Marine Special Management Zone	Panama Bight	Panama	0	0	0	1	1	22.4097	3.15315	0.71876	3.87167	1.58344	0.813786	62275.8	11.0393	0.842701	15934.4	9.6763	0.803134	145.632	4.98793	0.487265	2398.05	7.78283	0.968975	2266.47	7.72642	0.727142	7415.93	8.91152	0.933021
99	099	Leo Island Reef Observation Area		099. Leo Island Reef Observation Area	099. Leo Island Reef Observation Area	Houtman	Western Australia	0	0	1	0	1	17	2.89037	0.604509	3.5	1.50408	0.767104	27985.1	10.2395	0.652254	10531.5	9.26222	0.723504	0	0	0	166.145	5.11886	0.588409	0	0	0	2113.97	7.6568	0.716689
100	100	Levante de Mallorca Cala Ratjada		100. Levante de Mallorca Cala Ratjada	100. Levante de Mallorca Cala Ratjada	Western Mediterranean	Spain	0	1	0	1	0	13	2.63906	0.495242	0.5	0.405465	0.120862	3963.81	8.28521	0.186956	953.649	6.86134	0.261797	0	0	0	0	0	0	0	0	0	282.441	5.64701	0.370173
101	101	Lord Howe Commonwealth MPA	b	101. Lord Howe Commonwealth MPA b	101. Lord Howe Commonwealth MPA b	Lord Howe and Norfolk Islands	Australia	0	1	1	1	1	24.4375	3.23622	0.75488	4.45312	1.69619	0.880111	41629.9	10.6366	0.746809	20797.9	9.94266	0.854357	4755.78	8.46733	0.882651	4126.54	8.32544	1	1790.32	7.49071	0.690878	3900.47	8.26911	0.82226
102	102	Lord Howe Island Marine Park	b	102. Lord Howe Island Marine Park b	102. Lord Howe Island Marine Park b	Lord Howe and Norfolk Islands	New South Wales	0	1	1	0	0	17.7606	2.93176	0.622504	2.3409	1.20624	0.591907	28642.9	10.2627	0.657785	15249.2	9.63235	0.794682	1990.23	7.59651	0.783694	3.43363	1.48922	0.0698884	325.63	5.78883	0.429051	7245.76	8.88831	0.929019
103	103	Marmion Marine Park	b	103. Marmion Marine Park b	103. Marmion Marine Park b	Houtman	Western Australia	0	1	1	0	0	12.5602	2.60714	0.481364	2.61111	1.28402	0.637656	40651.9	10.6128	0.741149	29280.1	10.2847	0.920134	0	0	0	31.9945	3.49634	0.35662	61.3201	4.13228	0.174198	1893.43	7.54667	0.697702
104	104	Ningaloo Marine Park	c	104. Ningaloo Marine Park c	104. Ningaloo Marine Park c	Exmouth to Broome	Western Australia	0	1	1	1	0	37.8333	3.65928	0.938817	3.01389	1.38976	0.699859	40412.3	10.6069	0.739742	4289.85	8.36424	0.550816	956.914	6.86476	0.700541	612.315	6.41888	0.774125	0	0	0	3455.3	8.14795	0.801371
105	105	Ningaloo Marine Park	d	105. Ningaloo Marine Park d	105. Ningaloo Marine Park d	Ningaloo	Western Australia	0	1	1	1	0	32.9208	3.52403	0.880013	2.54583	1.26577	0.626925	33160	10.4091	0.69265	12661.6	9.44641	0.758925	1772.12	7.4805	0.770511	311.918	5.74594	0.677992	24.0655	3.22149	0.034076	3748.56	8.22939	0.815413
106	106	North Sydney Harbour Aquatic Reserve		106. North Sydney Harbour Aquatic Reserve	106. North Sydney Harbour Aquatic Reserve	Manning-Hawkesbury	New South Wales	0	1	1	0	0	19.5248	3.02163	0.66158	2.7381	1.31858	0.657986	26401	10.1812	0.63838	8754.41	9.07743	0.687967	24.5686	3.24136	0.288791	0	0	0	4938.62	8.50504	0.84693	3690.72	8.21385	0.812732
107	107	Panglima Laut		107. Panglima Laut	107. Panglima Laut	Western Sumatra	Indonesia	0	0	1	0	0	48.25	3.89691	1	0.75	0.559616	0.211539	24650.4	10.1126	0.622045	1142.95	7.04225	0.296586	0	0	0	137.136	4.92824	0.561177	0	0	0	3160.14	8.05869	0.785981
108	108	Port Davey National Park	b	108. Port Davey National Park b	108. Port Davey National Park b	Bassian	Tasmania	0	1	0	0	0	2.67602	1.30183	0	1.09184	0.738043	0.316496	1874.02	7.53638	0.00866109	757.118	6.63084	0.217469	52.0434	3.97111	0.371717	0	0	0	25.2568	3.26793	0.0412194	0	0	0
109	109	Port Stephens Great Lake Marine Park	b	109. Port Stephens Great Lake Marine Park b	109. Port Stephens Great Lake Marine Park b	Manning-Hawkesbury	New South Wales	0	1	0	1	0	17.5585	2.92093	0.617796	3.26236	1.44982	0.73519	85856.4	11.3604	0.919153	12136.1	9.40402	0.750773	3652.57	8.20346	0.852666	13.5676	2.6788	0.239828	55848.7	10.9304	1	5423.56	8.59869	0.879085
110	110	Pupukea Marine Life Conservation District		110. Pupukea Marine Life Conservation District	110. Pupukea Marine Life Conservation District	Hawaii	Hawaii	0	1	0	0	0	18	2.94444	0.628017	1.25	0.81093	0.359371	6428.93	8.76872	0.302076	725.309	6.58797	0.209226	0	0	0	0	0	0	0	0	0	185.347	5.22761	0.297864
111	111	Regno di Nettuno	b	111. Regno di Nettuno b	111. Regno di Nettuno b	Western Mediterranean	Italy	0	0	0	1	0	10.6	2.45101	0.41348	0.25	0.223144	0.0136139	3400.67	8.13202	0.150482	99.4336	4.6095	0	0	0	0	0	0	0	0	0	0	1657.45	7.41364	0.674765
112	112	Rose Atoll National Monument		112. Rose Atoll National Monument	112. Rose Atoll National Monument	Samoa Islands	American Samoa	0	1	0	1	1	30.3333	3.44468	0.845514	3.08333	1.40691	0.709949	29447.6	10.2904	0.664381	4880.6	8.49323	0.575621	0	0	0	71.921	4.28938	0.469911	1861.78	7.52982	0.696896	565.123	6.33881	0.48945
113	113	Rottnest Island	b	113. Rottnest Island b	113. Rottnest Island b	Houtman	Western Australia	0	1	0	0	0	16	2.83321	0.579658	2.5	1.25276	0.619272	7061.26	8.86252	0.324409	1829.97	7.5126	0.387039	0	0	0	206.307	5.3342	0.619171	0	0	0	2031.99	7.61726	0.709873
114	114	Rottnest Island	c	114. Rottnest Island c	114. Rottnest Island c	Leeuwin	Western Australia	0	1	1	0	0	15.0226	2.774	0.553914	2.90364	1.36191	0.683476	19007.9	9.85266	0.560158	8238.49	9.01669	0.676287	965.44	6.87362	0.701548	44.1797	3.81065	0.401521	319.945	5.77127	0.426349	2272.15	7.72892	0.729125
115	115	Seaflower Area Marina Protegida	b	115. Seaflower Area Marina Protegida b	115. Seaflower Area Marina Protegida b	Southwestern Caribbean	Colombia	0	0	0	0	1	30.1667	3.43935	0.843195	3.83333	1.57554	0.809139	113404	11.6387	0.985409	9708.04	9.18081	0.707849	0	0	0	0	0	0	121.981	4.81203	0.278774	189.384	5.24904	0.301559
116	116	Shoalwater Islands Marine Park		116. Shoalwater Islands Marine Park	116. Shoalwater Islands Marine Park	Leeuwin	Western Australia	0	1	1	0	0	8.14815	2.21355	0.31024	1.03333	0.709676	0.29981	9907.38	9.20114	0.405032	4786.26	8.47371	0.571868	0	0	0	0	0	0	0	0	0	451.637	6.11509	0.450878
117	117	Solitary Islands Marine Park	b	117. Solitary Islands Marine Park b	117. Solitary Islands Marine Park b	Tweed-Moreton	New South Wales	0	1	0	1	0	14.7024	2.75381	0.545136	1.80952	1.03302	0.490009	33695.6	10.4252	0.696465	11458.7	9.34659	0.739729	1562.02	7.35438	0.756179	9.21306	2.32367	0.189095	745.475	6.61536	0.55621	5114.77	8.54008	0.86898
118	118	St. Abbs and Eyemouth Marine Reserve		118. St. Abbs and Eyemouth Marine Reserve	118. St. Abbs and Eyemouth Marine Reserve	North Sea	Scotland	0	1	1	0	0	4.25	1.65823	0.0687948	0.9375	0.661398	0.271411	2233.95	7.71197	0.0504695	1250.48	7.13209	0.313863	0	0	0	0	0	0	0	0	0	0	0	0
119	119	Strangford Lough Marine Nature Reserve		119. Strangford Lough Marine Nature Reserve	119. Strangford Lough Marine Nature Reserve	Celtic Seas	Northern Ireland	0	0	1	1	0	3.125	1.41707	0	0.125	0.117783	0	105.719	4.6702	0	42.9004	3.78192	0	0	0	0	0	0	0	0	0	0	0	0	0
120	120	Table Mountain National Park	b	120. Table Mountain National Park b	120. Table Mountain National Park b	Agulhas Bank	South Africa	0	0	1	1	0	4.625	1.72722	0.0987917	0.75	0.559616	0.211539	10137	9.22404	0.410487	358.055	5.88348	0.0737453	0	0	0	0	0	0	588.003	6.37843	0.519759	0	0	0
121	121	Wadi El Gemal - Hamata Reserve		121. Wadi El Gemal - Hamata Reserve	121. Wadi El Gemal - Hamata Reserve	Northern and Central Red Sea	Egypt	0	0	0	1	0	43.4	3.79324	0.997061	4.2	1.64866	0.852152	17281.7	9.75746	0.537491	4513.3	8.41501	0.560578	0	0	0	139.631	4.94614	0.563734	100.861	4.62361	0.249787	1691.82	7.43415	0.678302
		Min											1.16667	0.77319		0.0416667	0.040822		57.834	4.07472		21.3444	3.10657		0	0		0	0		0	0		0	0
		Mean											19.2094	2.79338		3.01424	1.26788		33581	9.77571		13847.2	8.53577		2314.89	2.77746		514.708	3.3612		2508.49	3.88781		3238.29	6.45655
		Median											16.9107	2.8854		2.81667	1.33938		22739.3	10.0319		6293.68	8.74746		0	0		44.6494	3.82099		100.861	4.62361		1816.44	7.50519
		Max											60.5	4.11904		9.95	2.39334		239052	12.3844		132568	11.7949		63531.7	11.0593		6255.78	8.74142		55848.7	10.9304		62889.7	11.0492
													ln			ln			ln			ln			ln			ln			ln			ln
		High											3.8	44.7012		1.9	6.68589		11.7	120572		10.7	44355.9		9.5	13359.7		8	2980.96		9.5	13359.7		9.3	10938
		Med											2.65	14.154		1.05	2.85765		9.6	14764.8		8.1	3294.47		5.1	164.022		4.5	90.0171		6.25	518.013		6.4	601.845
		Low											1.5	4.48169		0.2	1.2214		7.5	1808.04		5.5	244.692		0.7	2.01375		1	2.71828		3	20.0855		3.5	33.1155
